# Supplementary material
Source: PubMed Central journal article supplement (PMC3711189)
Supplement: NIHMS464426-supplement-1.pdf [file NIHMS464426-supplement-1.pdf]

**Akt and mTOR pathways differentially regulate the development of natural and inducible  
T<sub>H</sub>17 cells**

Jiyeon S Kim, Tammarah Sklarz, Lauren Banks, Mercy Gohil, Adam T Waickman, Nicolas Skuli, Bryan L Krock, Chong T Luo, Weihong Hu, Kristin N Pollizzi, Ming O Li, Jeffrey C Rathmell, Morris J Birnbaum, Jonathan D Powell, Martha S Jordan & Gary A Koretzky

**Supplementary Figures 1 – 10**

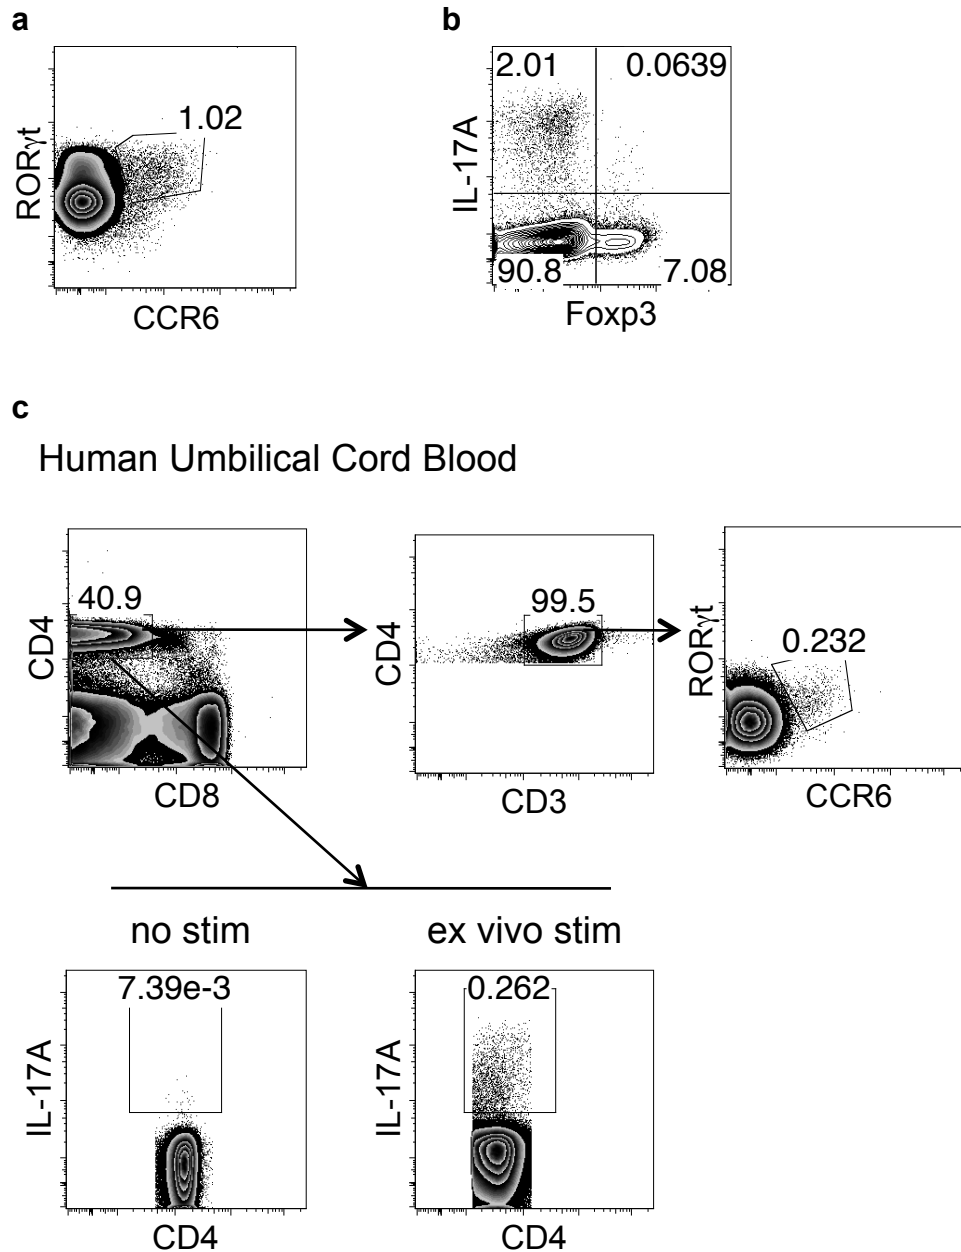

**Supplementary Figure 1. nT<sub>H</sub>17 cells are present in human thymus and umbilical cord blood.** (a) Thymocytes from 18-19-week human fetal thymi were stained for ROR $\gamma$ t and CCR6 expression. Flow plots are gated on CD4<sup>SP</sup> cells. (b) Thymocytes from 18-19 week human fetal thymi were stained for IL-17 and Foxp3 following *ex vivo* stimulation for 5 h with PMA/ionomycin and brefeldin A. Flow plots are gated on CD4<sup>SP</sup> cells. (c) Cells from umbilical cord blood were isolated and stained for surface markers and intracellular expression of IL-17A upon *ex vivo* stimulation for 5 h with PMA/ionomycin and brefeldin A. Gating strategy as shown. Data are representative of at least three independent experiments. Numbers indicate percentages for the gated populations.

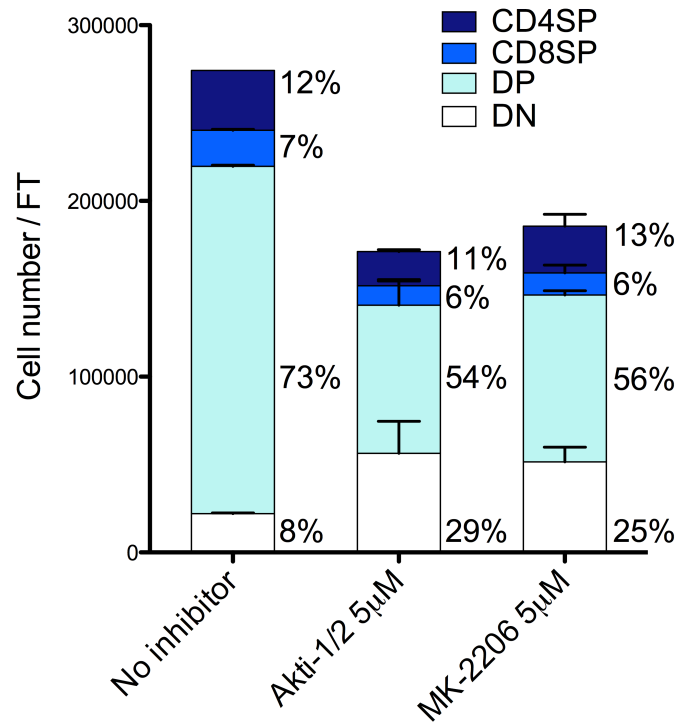

**Supplementary Figure 2. Effect of Akt inhibitor treatment on thymocyte subsets in FTOC.**

Thymocytes from d7 of E15-initiated FTOC, cultured for the last 2 days in the presence of indicated concentrations of allosteric Akt inhibitors, were analyzed. Percentage of each thymocyte population is indicated. Data are pooled from two (MK-2206) and three (Akti-1/2) independent experiments ( $n = 4-5$ ; mean  $\pm$  SEM).

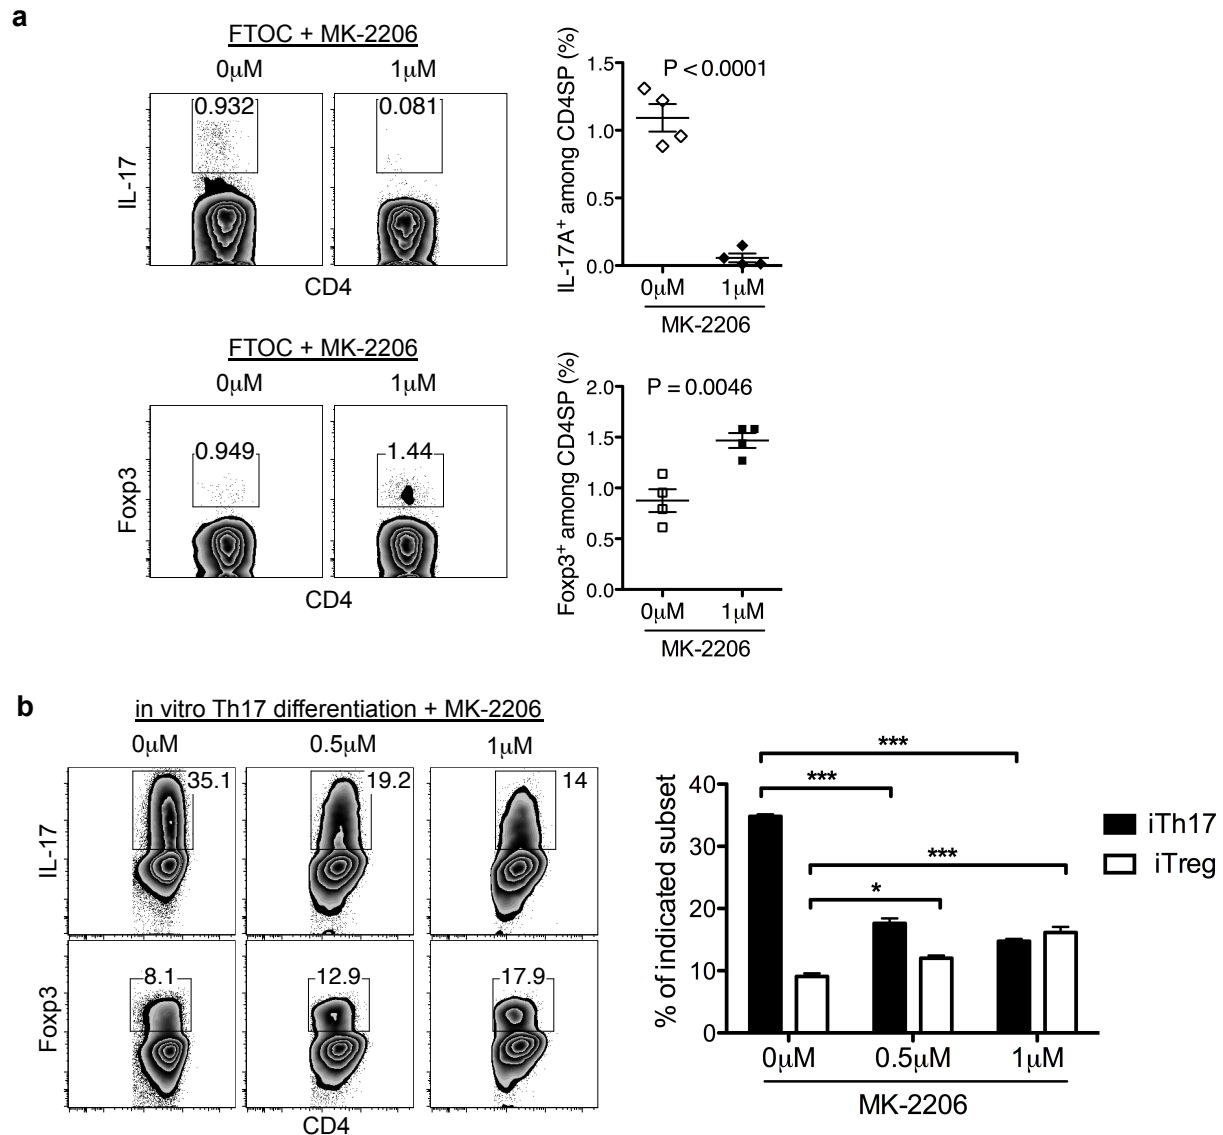

**Supplementary Figure 3. Allosteric Akt inhibitor MK-2206 treatment impairs nT<sub>H</sub>17 cell development in FTOC.** (a) Cells from d7 of E15-initiated FTOC, cultured for the last 2 days in the presence of indicated concentrations of allosteric Akt inhibitor MK-2206, were stimulated with PMA/ionomycin and analyzed. Representative flow plots are gated on CD4<sup>SP</sup>TCR $\beta$ <sup>+</sup>TCR $\gamma$  $\delta$ <sup>-</sup> cells. Graphs show either the percent of IL-17<sup>+</sup> or Foxp3<sup>+</sup> cells among CD4<sup>SP</sup> cells pooled from two independent experiments ( $n = 4$ ; mean  $\pm$  SEM;  $P$  value from two-tailed Student's  $t$ -test). (b) IL-17 or Foxp3 expression is shown for WT naïve CD4<sup>+</sup> T cells activated for 18 h with anti-CD3 plus anti-CD28, followed by 36 h culture with iT<sub>H</sub>17-polarizing condition in the presence of indicated concentrations of MK-2206, and 5 h re-stimulation with PMA/ionomycin with brefeldin A. Representative flow plots are shown. The graph shows pooled data from  $n = 3$  per condition and bars and error bars represent mean  $\pm$  SEM. \* $P \leq 0.05$ , \*\*\* $P \leq 0.001$  (one-way ANOVA followed by Dunnett's post-test with 0  $\mu$ M as control group).

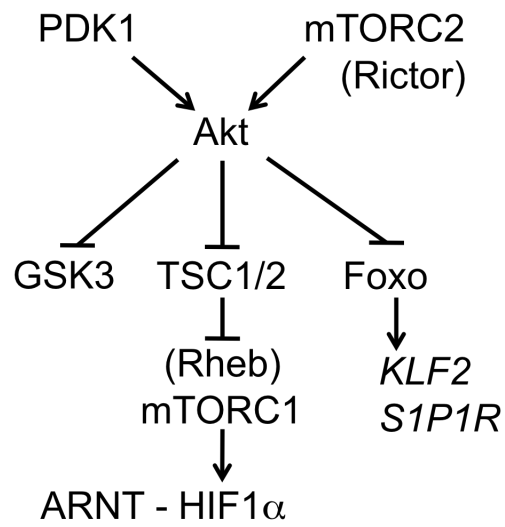

**Supplementary Figure 4. Schematic of the Akt pathway.**

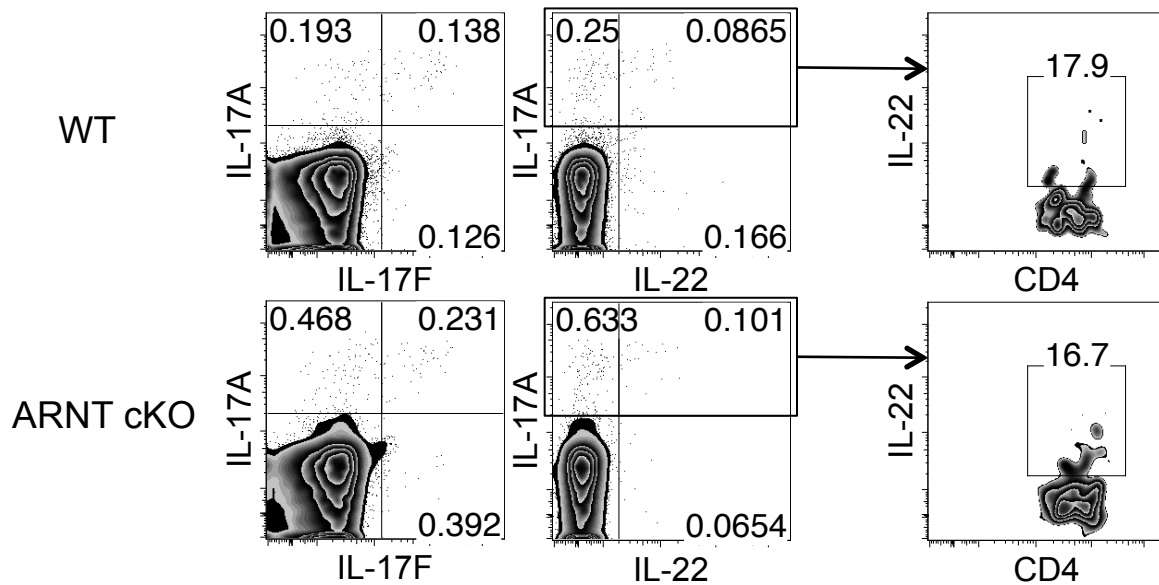

**Supplementary Figure 5. IL-22 and IL-17F expression is intact in ARNT-deficient nT<sub>H</sub>17 cells.** IL-17F and IL-22 expression in thymocytes from WT and ARNT-cKO mice following *ex vivo* stimulation is shown. Representative flow plots are gated on CD4<sup>SP</sup>TCRβ<sup>+</sup>TCRγδ<sup>-</sup> cells (first and second columns) or IL-17A<sup>+</sup>CD4<sup>SP</sup>TCRβ<sup>+</sup>TCRγδ<sup>-</sup> cells (third column). Data are from two independent experiments.

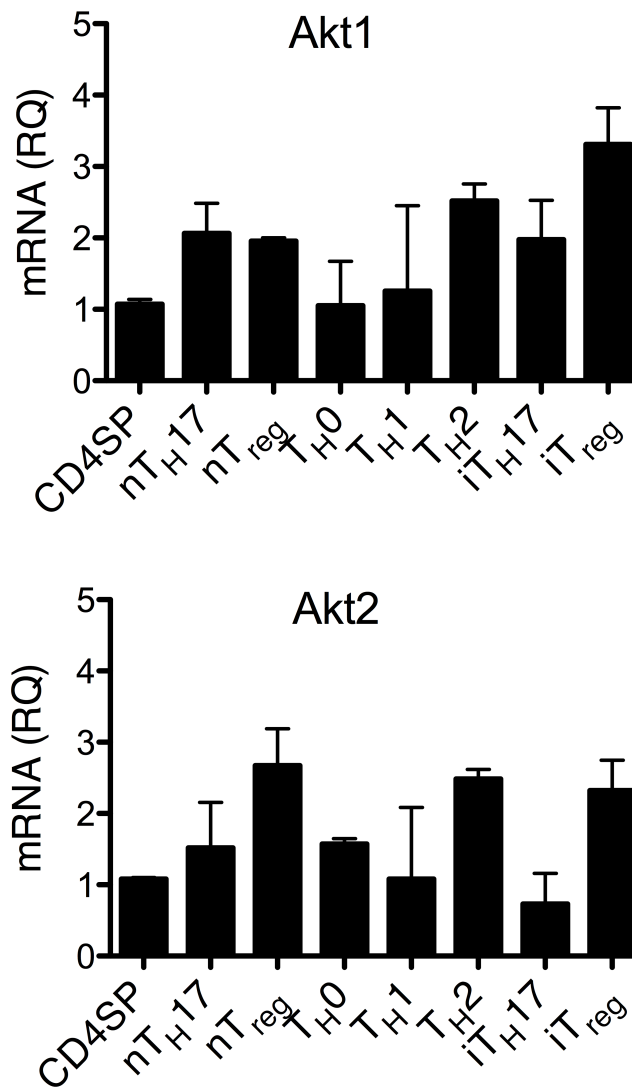

**Supplementary Figure 6. mRNA expression of Akt1 and Akt2 in CD4<sup>+</sup> T cell subsets and thymocyte populations.** Akt1 and Akt2 mRNA transcripts from either *in vitro* differentiated CD4<sup>+</sup> T cells (T<sub>H</sub>0, T<sub>H</sub>1, T<sub>H</sub>2, iT<sub>H</sub>17, iT<sub>reg</sub>) or sorted WT thymocytes (CD4<sup>SP</sup>, CD4<sup>+</sup>CD44<sup>lo</sup>CCR6<sup>-</sup>; nT<sub>H</sub>17, CD4<sup>+</sup>CD44<sup>hi</sup>CCR6<sup>+</sup>; nT<sub>reg</sub>, CD4<sup>+</sup>Foxp3<sup>+</sup> from Foxp3-GFP reporter mice), relative to β-actin, was determined by real-time PCR. cDNA was generated from 3 independently sorted thymic populations or 2 independently generated T<sub>H</sub> subsets. All samples were run in triplicate; bars and error bars represent mean ± SEM.

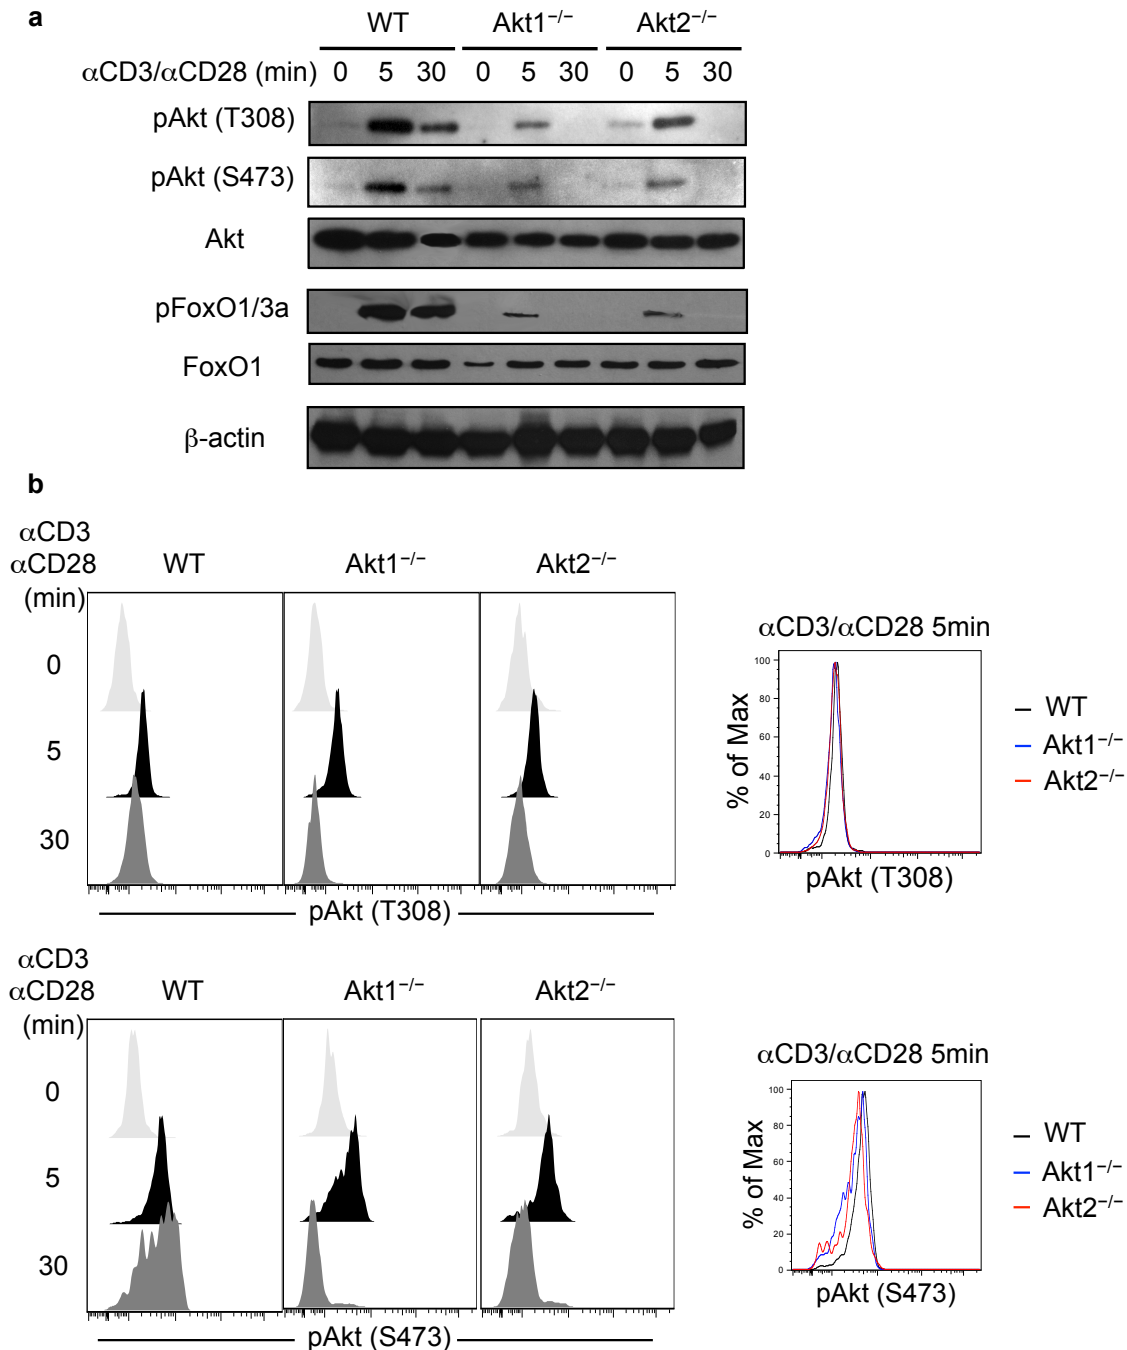

**Supplementary Figure 7. Akt1 and Akt2 contribute equally to the pool of active Akt in CD4<sup>+</sup> T cells.** (a) Immunoblot analysis of Akt activation, assessed by phosphorylation of p-Akt (T308) (n = 2), p-Akt (S473) (n = 1) and p-Foxo1/3a proteins (n = 2), in WT, *Akt1*<sup>-/-</sup>, and *Akt2*<sup>-/-</sup> CD4<sup>+</sup> T cells stimulated for 5 min or 30 min with anti-CD3 and anti-CD28. (b) Phospho-flow analysis of Akt activation at indicated residue (T308 and S473) in WT, *Akt1*<sup>-/-</sup> and *Akt2*<sup>-/-</sup> CD4<sup>+</sup> T cells stimulated for 5 min or 30 min with anti-CD3 and anti-CD28. Data are representative of two independent experiments with n ≥ 5 per genotype.



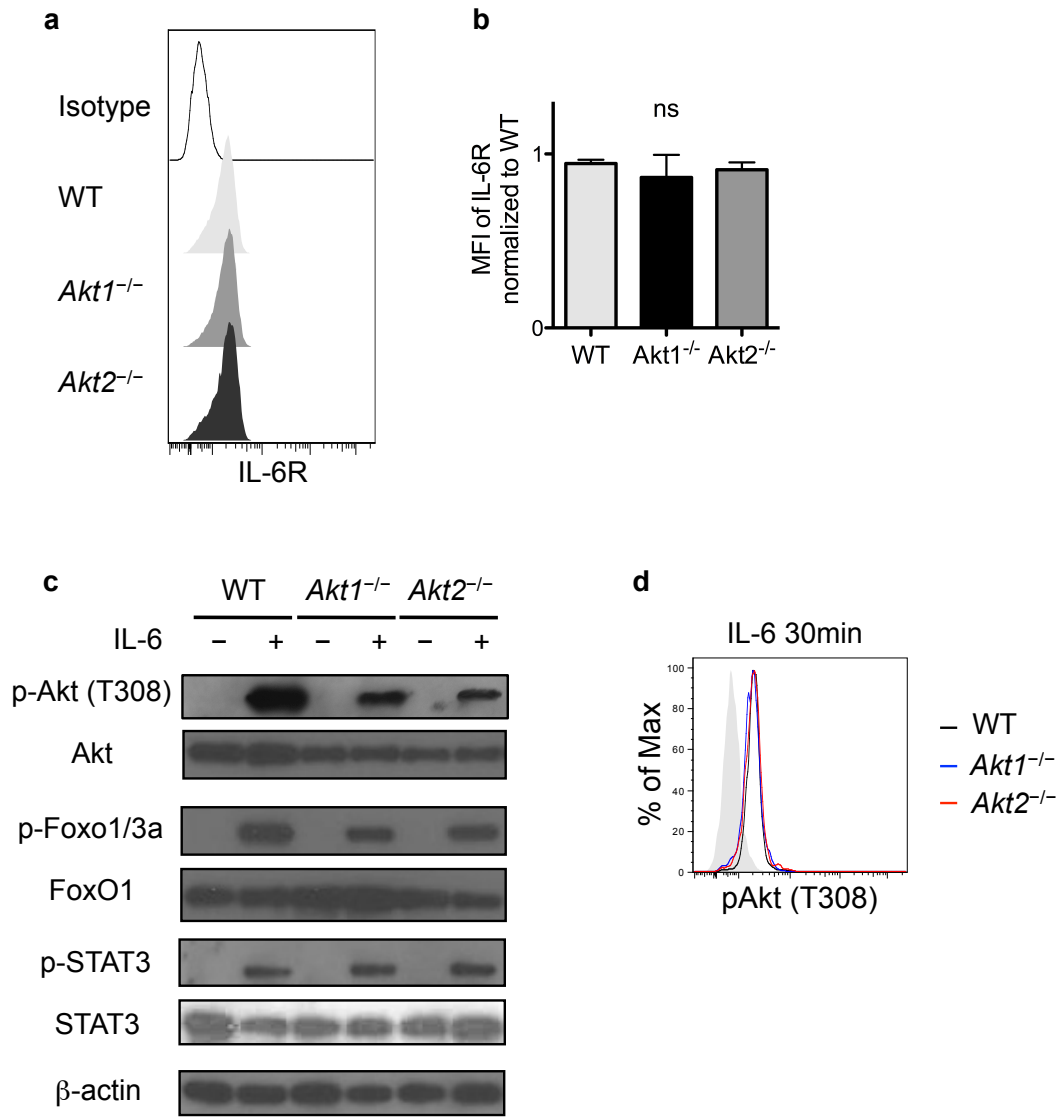

**Supplementary Figure 8. IL-6 does not differentially activate Akt1 versus Akt2.** **(a)** Expression of IL-6R (CD126) in WT, *Akt1*<sup>-/-</sup> and *Akt2*<sup>-/-</sup> CD4<sup>+</sup> T cells analyzed by flow cytometry. Data are representative of two independent experiments ( $n \geq 5$  per genotype). **(b)** Expression of IL-6R in WT, *Akt1*<sup>-/-</sup> and *Akt2*<sup>-/-</sup> CD4<sup>+</sup> T cells compared by mean fluorescence intensity (MFI). Graph shows pooled data from  $n \geq 5$  mice per genotype and bars and error bars represent mean  $\pm$  SEM. ns, not-significant (one-way ANOVA followed by Dunnett's post-test with WT as control group). **(c)** Immunoblot analysis of Akt activation, assessed by phosphorylation of Akt (p-Akt) and Foxo (p-Foxo1/3a) proteins, in WT, *Akt1*<sup>-/-</sup> and *Akt2*<sup>-/-</sup> CD4<sup>+</sup> T cells stimulated with IL-6 for 30 min. Phosphorylation of STAT3 (p-STAT3) serves as positive control. Data are representative of two independent experiments. **(d)** Phospho-flow analysis of Akt activation in WT, *Akt1*<sup>-/-</sup> and *Akt2*<sup>-/-</sup> CD4<sup>+</sup> T cells stimulated with IL-6 for 30 min. Shaded histogram represents unstimulated cells. Data are representative of two independent experiments with  $n \geq 5$  per genotype.

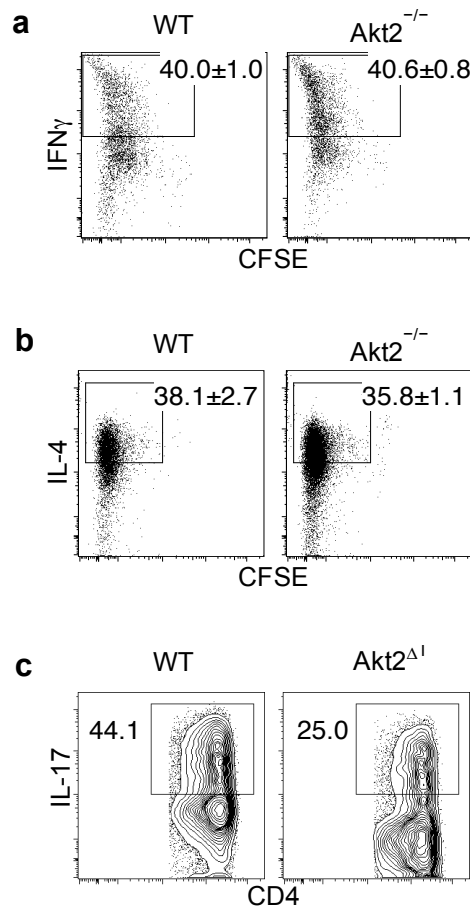

**Supplementary Figure 9. T<sub>H</sub>1 and T<sub>H</sub>2 cell differentiation is intact in *Akt1*<sup>-/-</sup> and *Akt2*<sup>-/-</sup> CD4<sup>+</sup> T cells.** (a) CFSE dilution and IFN-γ production is shown for WT and *Akt2*<sup>-/-</sup> CD4<sup>+</sup> T cells that were cultured with plate-bound anti-CD3 plus anti-CD28 in T<sub>H</sub>1-polarizing condition for 4 days. (b) CFSE dilution and IL-4 production is shown for WT and *Akt2*<sup>-/-</sup> CD4<sup>+</sup> T cells that were cultured with plate-bound anti-CD3 plus anti-CD28 in T<sub>H</sub>2-polarizing condition for 4 days. (c) iT<sub>H</sub>17 differentiation is defective in *Akt2*<sup>Δ1</sup> mice. IL-17 production in WT (*Akt*<sup>fl/fl</sup> CD4<sup>cre</sup><sup>-</sup>) and *Akt2*<sup>Δ1</sup> CD4<sup>+</sup> T cells cultured with plate-bound anti-CD3 plus anti-CD28 in T<sub>H</sub>17-polarizing condition for 3 days. Data are representative of at least two independent experiments (a-c).

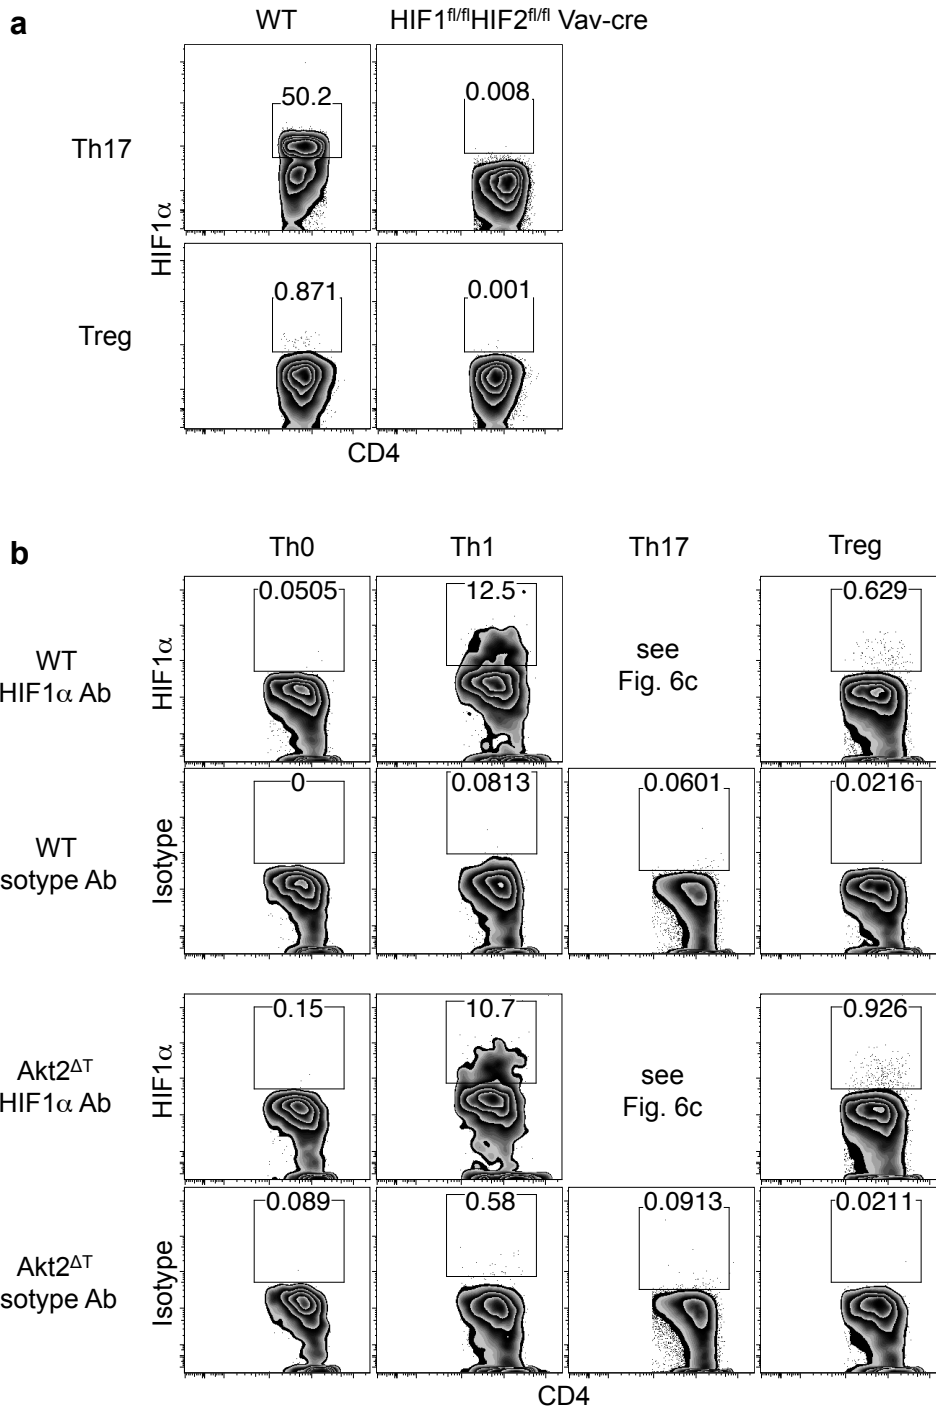

**Supplementary Figure 10. Detection of intracellular HIF1 $\alpha$  protein expression using flow cytometry. (a)** HIF1 $\alpha$  expression in WT and *Hif1a*<sup>fl/fl</sup>*Hif2*<sup>fl/fl</sup> Vav-cre CD4<sup>+</sup> T cells cultured with plate-bound anti-CD3 plus anti-CD28 in T<sub>H</sub>17- or T<sub>reg</sub>-polarizing condition; n = 1. **(b)** Intracellular staining using HIF1 $\alpha$  or isotype antibody to assess HIF1 $\alpha$  expression in WT and *Akt2*<sup>fl/fl</sup> Vav-cre (*Akt2* $\Delta^T$ ) CD4<sup>+</sup> T cells cultured under T<sub>H</sub>0, T<sub>H</sub>1, T<sub>H</sub>17 or T<sub>reg</sub>-polarizing conditions. Representative plots from 2 independent experiments are shown.
